# Supplementary material
Source: Springer Nature journal article supplement (https://www.springermedizin.de/resource/supplementary/12993_2010_320_MOESM2_ESM.pdf/9617562)

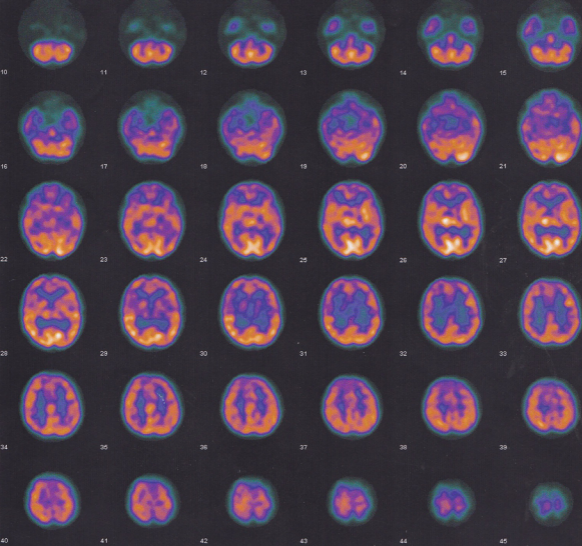

Feet to Head

Transversal

Supplement: MOESM2 [file 9617562]
